# Supplementary material
Source: PubMed Central journal article supplement (PMC8087250)
Supplement: NIHMS1643404-supplement-1.pdf [file NIHMS1643404-supplement-1.pdf]

Supplementary figure and table

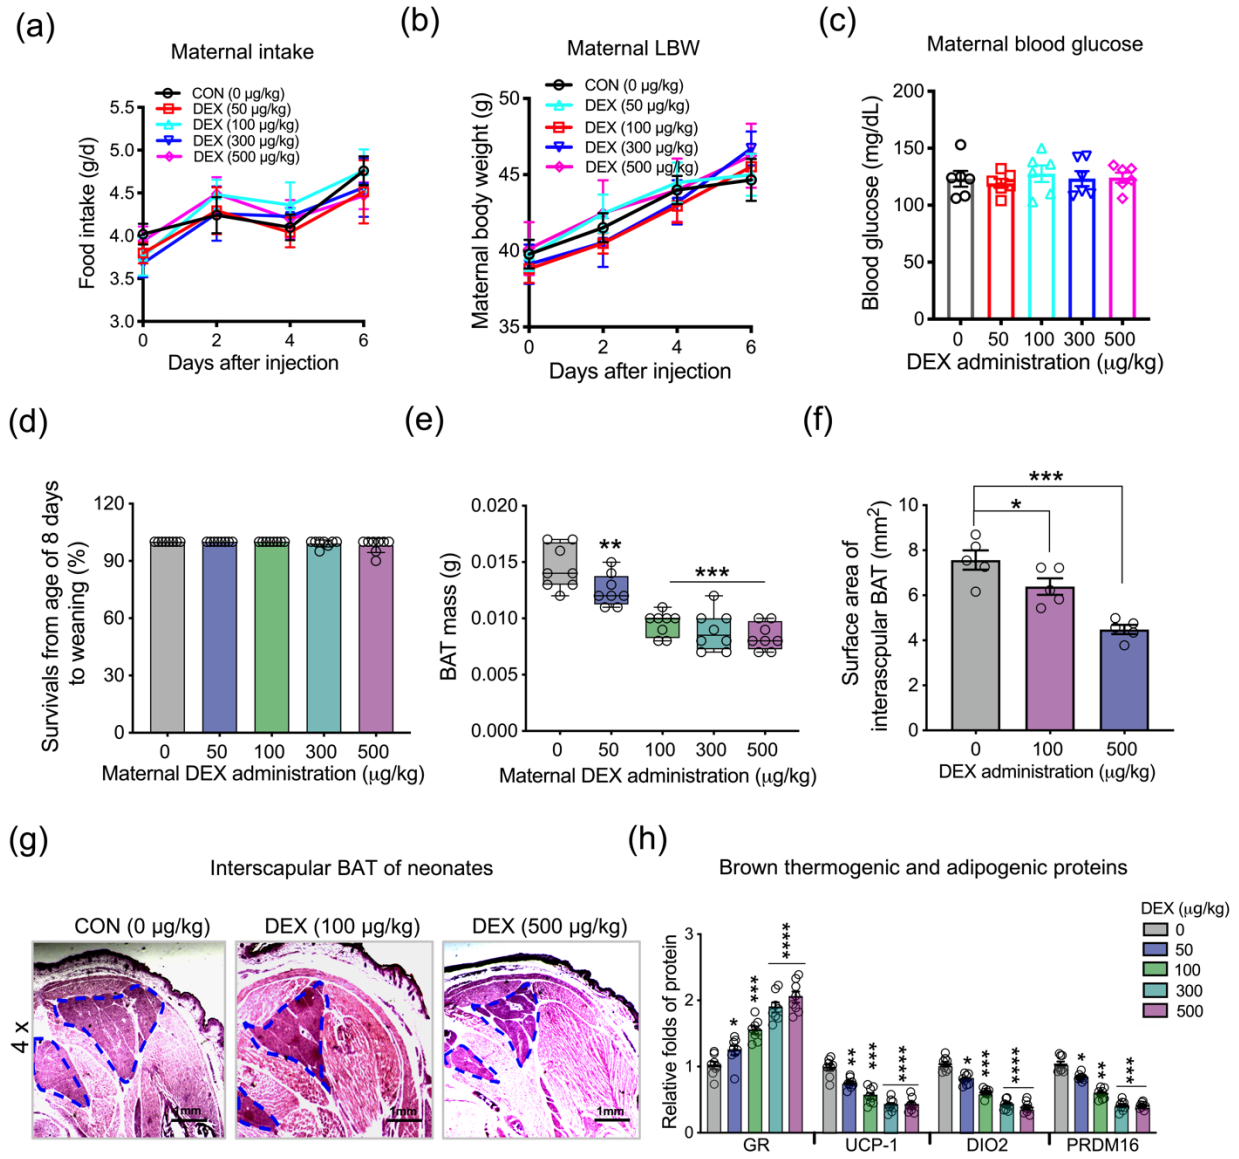

**Fig. S1.** (a–c) Food intake (a), body mass (b) and blood glucose (c) of pregnant mice administrated with dosed synthetic glucocorticoids dexamethasone (DEX) in the last trimester ( $n = 8$  in each group). (d) Neonatal survival percentage from age of 7 days to weaning ( $n = 8$  in each group). (e) Neonatal BAT mass on postnatal day 1 (P1). (f and g) H&E staining measurement of surface area of interscapular BAT in neonates at P1. Surface area of BAT in blue dash line was quantified by ImageJ ( $n = 5$  in each group). (h) Quantified protein contents of

glucocorticoid receptor (GR), UCP-1, DIO2 and PRDM16 in neonatal BAT.  $\beta$ -actin was used as a loading control ( $n = 8$  in each group). Data are mean  $\pm$  SEM and each dot represents one replicate (each pregnancy); \* $P < 0.05$ , \*\* $P < 0.01$ , \*\*\* $P < 0.001$ , \*\*\*\* $P < 0.0001$ ; unpaired one-way ANOVA multiple test was used in analyses.

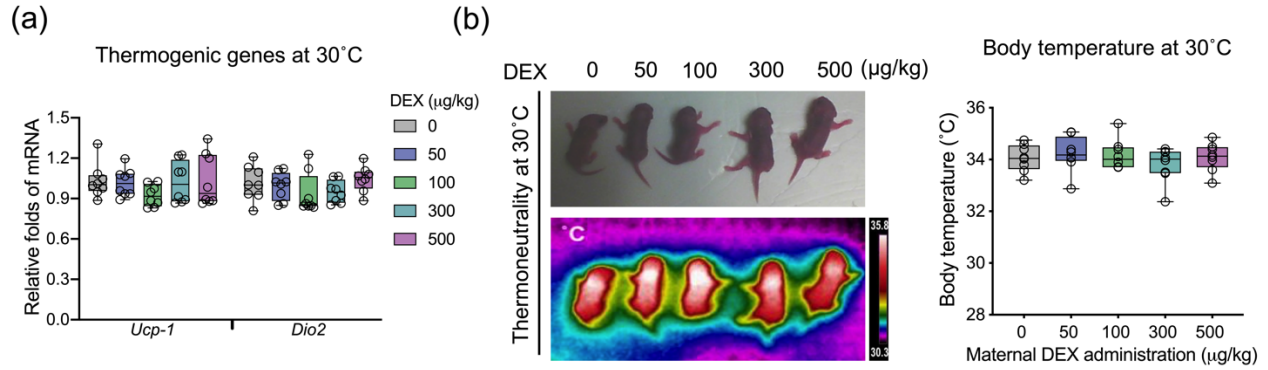

**Fig. S2.** (a) mRNA expression of thermogenic genes *Ucp-1* and *Dio2* in neonatal BAT at 30°C. Gene expression was normalized to 18S rRNA ( $n = 8$  in each group). (b) Thermal imaging of neonates on postnatal day 1 (P1) under 30°C. After neonates were removed from nests, thermal images were recorded immediately ( $n = 8$  in each group). Data are mean  $\pm$  SEM and each dot represents one replicate (each pregnancy); \* $P < 0.05$ , \*\* $P < 0.01$ , \*\*\* $P < 0.001$ , \*\*\*\* $P < 0.0001$ ; unpaired one-way ANOVA multiple test was used in analyses.

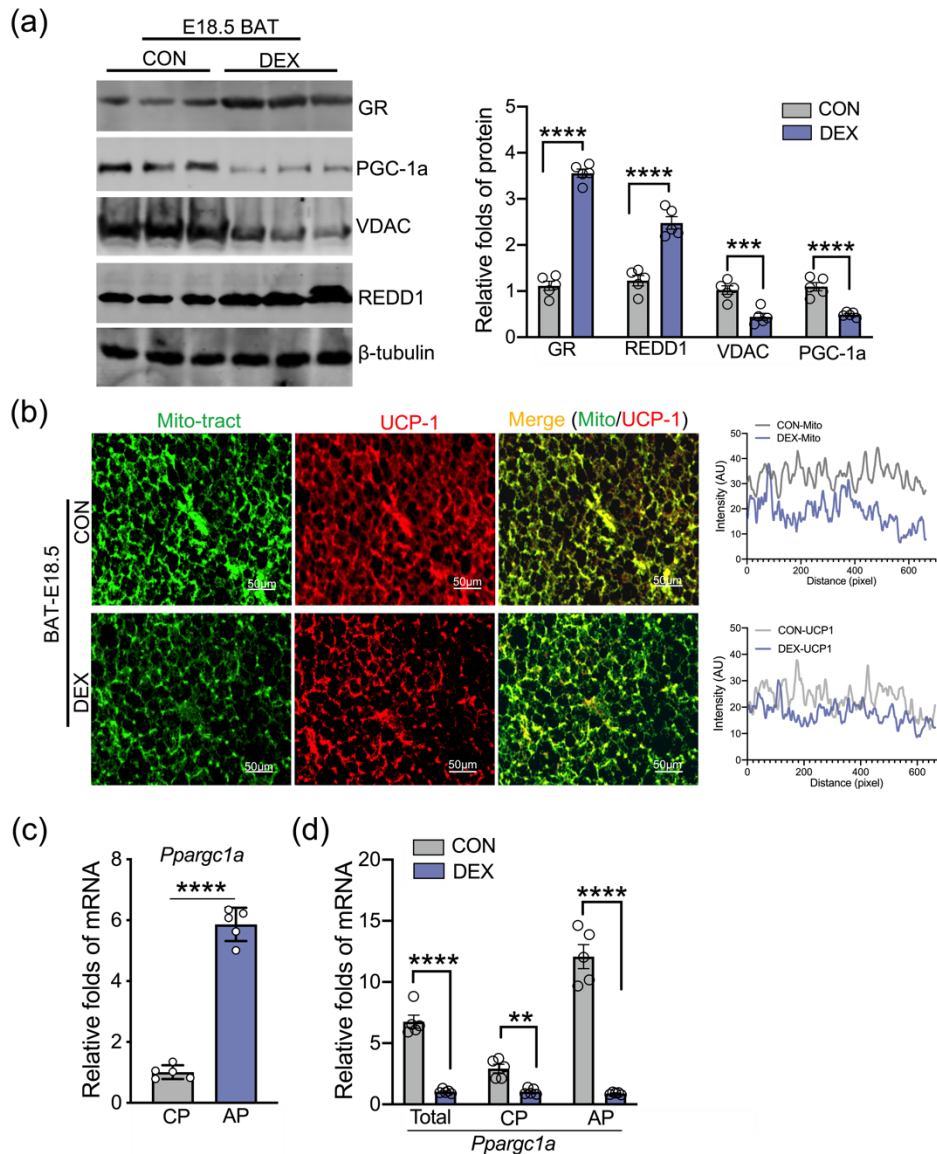

**Fig. S3.** (a–d) Pregnant mice were administrated with 100  $\mu\text{g}/\text{kg}$  dexamethasone (DEX) in the last trimester. Brown fat was collected in fetuses on embryonic day E18.5. (a) Immunoblotting measured the protein expression of glucocorticoid receptor (GR), PGC-1a, VDAC and REDD1 in fetal BAT.  $\beta$ -tubulin was used as a loading control ( $n = 5$ ). (b) Immunostaining measurements of mitochondria (mito-tracker; green) and UCP-1 (red) in fetal BAT. Intensity of UCP-1 and mito-tracker was quantified by Image-J ( $n = 3$  in each group). Scale bar: 50  $\mu\text{m}$ . (c) Relative *Pparg1a* expression transcribed from canonical promoter (CP) and alternative promoter (AP) in

fetal BAT ( $n = 4$ ). (d) Relative *Ppargc1a* total, CP and AP transcriptions in fetal BAT affected by DEX exposure ( $n = 5$ ). mRNA was normalized to 18S rRNA. Data are mean  $\pm$  SEM and each dot represents one replicate; \* $P < 0.05$ , \*\* $P < 0.01$ , \*\*\* $P < 0.001$ , \*\*\*\* $P < 0.0001$ ; unpaired Student's *t*-test with two-tailed distribution was used in two treatment data analyses.

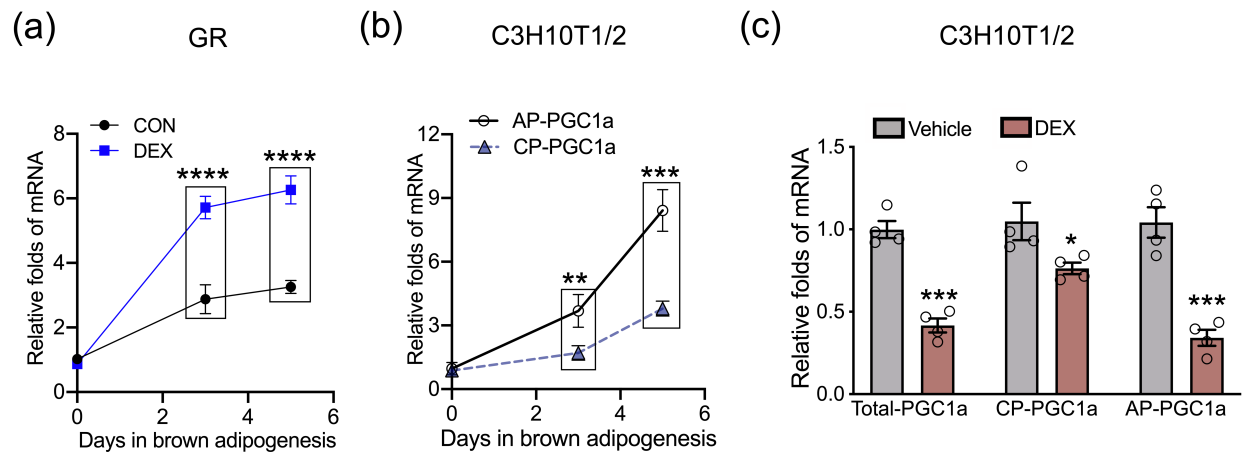

**Fig. S4.** (a) Glucocorticoid receptor (GR) expression in brown adipocyte differentiation of mouse embryonic fibroblasts treated with 10  $\mu\text{mol/L}$  dexamethasone ( $n = 4$ ). Gene expression was normalized to 18S rRNA. (b and c) C3H10T1/2 cell lines were induced for brown adipocyte differentiation. During brown adipogenesis, cells were also treated with vehicle or 10  $\mu\text{mol/L}$  dexamethasone (DEX) ( $n = 4$ ). *Pparg1a* transcription from the alternative (AP) and canonical promoters (CP) during brown adipocyte differentiation (b). (c) *Pparg1a* transcription from AP and CP in differentiated brown adipocytes on day 5. Gene expression was normalized to 18S rRNA. Data are representative of three separate experiments. Data are mean  $\pm$  SEM and each dot represents one replicate; \* $P < 0.05$ , \*\* $P < 0.01$ , \*\*\* $P < 0.001$ , \*\*\*\* $P < 0.0001$ ; unpaired Student's *t*-test with two-tailed distribution was used in two treatment data analyses.

**Table S1.** qPCR primer sequences for gene expression analyses

| <b>Name</b>                | <b>Forward primers</b>        | <b>Reverse primers</b>     |
|----------------------------|-------------------------------|----------------------------|
| <i>I8s</i>                 | GTAACCCGTTGAACCCATT           | CCATCCAATCGGTAGTAGCG       |
| <i>UCP-1</i>               | ACTGCCACACCTCCAGTCATT         | CTTTGCCTCACTCAGGATTGG      |
| <i>PRDM16</i>              | CAGCACGGTGAAGCCATTC           | GCGTGCATCCGCTTGTG          |
| <i>Total Pparg1a</i>       | TAGATGAAGAGAATGAGGCCAACTTGCTA | ACTGGCCTCGTTGTCAGTGGTC     |
| <i>Alternative Pparg1a</i> | GCACTCCAGCAGAATGAG            | TTTCAAAATTGAATCCATGG       |
| <i>Canonical Pparg1a</i>   | GTGTGCTGTGTGTCAGAGTGGAT       | CTCTATGTCACTCCATACAGAGTCTT |
| <i>Cidea</i>               | ATCACAACCTGGCCTGGTTACG        | TACTACCCGGTGTCCATTTCT      |
| <i>Elvol3</i>              | TCCGCGTTCTCATGTAGGTCT         | GGACCTGATCCAACCCTATGA      |
| <i>PPARg</i>               | AAACTCTGGGAGATTCTCCTGTT       | GCATCTCTGTGTCAACCATGGT     |
| <i>C/EBPa</i>              | TGCGCAAGAGCCGAGATAAA          | CCTTCTGTTGCGTCTCCACG       |
| <i>Fasn</i>                | GGAGGTGGTGATAGCCGGTAT         | TGGGTAATCCATAGAGCCCAG      |
| <i>Dio2</i>                | ATTATGCCTCGGAGAAGA            | ACCAAAGTTGACCACCAG         |
| <i>Slc27a2</i>             | CCAAAAGCGGCAACCATCAA          | GGTACCGAAGCAGTTCACCA       |
| <i>Ppara</i>               | TGGTGTTTCGCAGCTGTTTTG         | GTCAGTTCACAGGGAAGGCA       |
| <i>Gaphdh</i>              | CCCTTAAGAGGGATGCTGCC          | ACTGTGCCGTTGAATTTGCC       |
| <i>Cytochrome c</i>        | GTTCAGAAGTGTGCCCAGTG          | GGTTAACCCAAGCAACCTGTG      |
| <i>LPL</i>                 | CATGGATGGACGGTAACGGG          | GTCAGACTTCCTGCTACGCC       |
| <i>Zfp423</i>              | GTCACCAGTGCCAGGAAGAAGAC       | AACATCTGGTTGCACAGTTTACTCAT |
| <i>Slc7a10</i>             | GGAGTCACTATCCTGGGCCT          | AGCGTGTGTCATGGACTCTGTG     |
| <i>Agt</i>                 | AGGTTGGCGCTGAAGGATAC          | AGGCTCGAACGTTGACTCTG       |
| <i>Cirbp</i>               | CTTTTTCCGTGGGGGACGAA          | TCGTTGTGTGTAGCATAACTGTCA   |
| <i>Dazap2</i>              | CACCATGAACAGCAAAGGTCAA        | TGGGGATTGTGGAGCCTAGA       |
| <i>Hsbp1</i>               | ATCACTGGCAAGCACGAAGA          | GGCCTCGAAAGTAACCGGAA       |

|              |                      |                      |
|--------------|----------------------|----------------------|
| <i>Hsp70</i> | CCGACAAGGAGGAGTTCGTG | GACAGTCCTCAAGGCCACAT |
| <i>Nrf1</i>  | ACGTTACAGGGCGGTGAAAT | ATCTGGACCAGGCCATTAGC |
| <i>Nrf2</i>  | GCCCTCAGCATGATGGACTT | TGGTGTCTGTCTGGATGTGC |
| <i>Tfam</i>  | CCTGAGGAAAAGCAGGCATA | ATGTCTCCGGATCGTTTCAC |
| <i>Tfb1m</i> | CACCGAGGGCTTGGAATGTT | TAGAACCCGCAGCTTTCTGG |
| <i>Tfb2m</i> | TAAAGCTGGTGCCAGAGTGG | AGGAACACCTGCTGACCAAG |
| <i>VDAC</i>  | CTCCGCCGAGAGGACGAA   | CTCCCTATGGGGTCTCGCTC |

---
